# Supplementary material
Source: PubMed Central journal article supplement (PMC5461376)
Supplement: CVI.00028-17_zcd999095482s1.pdf [file CVI.00028-17_zcd999095482s1.pdf]

**Table S1.** Week 7 CD4i-specific IgG responses as a percent of total FLSC-specific IgG levels in Env-rFc-immunized animals.

| <b>Env-rFc<br/>Animal<br/>ID</b> | <b>anti-CD4i<br/>IgG<br/>(ng/mL)</b> | <b>anti-<br/>FLSC IgG<br/>(ng/mL)</b> | <b>% anti-CD4i responses<br/>(a-CD4i IgG/a-FLSC IgG*100)</b> |
|----------------------------------|--------------------------------------|---------------------------------------|--------------------------------------------------------------|
| <b>811</b>                       | 27828                                | 51587                                 | 54                                                           |
| <b>814</b>                       | 16044                                | 60724                                 | 26                                                           |
| <b>815</b>                       | 0                                    | 36496                                 | 0                                                            |
| <b>819</b>                       | 16181                                | 126498                                | 13                                                           |
| <b>821</b>                       | 15805                                | 93564                                 | 17                                                           |
| <b>822</b>                       | 4867                                 | 49138                                 | 10                                                           |
|                                  |                                      |                                       | <b>Average % anti-CD4i IgG:</b><br>20                        |

**Table S2.** ADCC activity in each animal that was immunized with Env or Env-rFc.

| <b>Animal ID</b> | <b>Immunogen Received</b> | <b>Week</b> | <b>Peak % Granzyme B activity</b> | <b>Serum Titer</b> |
|------------------|---------------------------|-------------|-----------------------------------|--------------------|
| 802              | Env                       | 0           | 0.745                             | < 100              |
| 802              | Env                       | 7           | 0.635                             | < 100              |
| 809              | Env                       | 0           | 0.925                             | < 100              |
| 809              | Env                       | 7           | 0.505                             | < 100              |
| 816              | Env                       | 0           | 3.295                             | < 100              |
| 816              | Env                       | 7           | 5.535                             | < 100              |
| 817              | Env                       | 0           | 1.09                              | < 100              |
| 817              | Env                       | 7           | 0.23                              | < 100              |
| 820              | Env                       | 0           | 1.05                              | < 100              |
| 820              | Env                       | 7           | 0.49                              | < 100              |
| 811              | Env-rFc                   | 0           | 1.225                             | < 100              |
| 811              | Env-rFc                   | 7           | 7.435                             | < 100              |
| 814              | Env-rFc                   | 0           | 0.605                             | < 100              |
| 814              | Env-rFc                   | 7           | 20.835                            | 330                |
| 815              | Env-rFc                   | 0           | 1.255                             | < 100              |
| 815              | Env-rFc                   | 7           | 12.235                            | 188                |
| 819              | Env-rFc                   | 0           | 0.67                              | < 100              |
| 819              | Env-rFc                   | 7           | 8.82                              | 168                |
| 821              | Env-rFc                   | 0           | 1.02                              | < 100              |
| 821              | Env-rFc                   | 7           | 9.02                              | 133                |
| 822              | Env-rFc                   | 0           | -0.14                             | < 100              |
| 822              | Env-rFc                   | 7           | 7.98                              | < 100              |

Week 0 (where animals are naïve to immunogen) and week 7 are shown. Both the peak percent Granzyme B activity and the titer at which it was achieved are reported.

| Table S3. anti-Env or anti-FLSC serum IgG levels in the Env-rFc or Env groups over time* |                            |       |       |       |       |       |                             |                             |       |       |        |       |       |       |
|------------------------------------------------------------------------------------------|----------------------------|-------|-------|-------|-------|-------|-----------------------------|-----------------------------|-------|-------|--------|-------|-------|-------|
| Env-rFc<br>IM<br>Group:                                                                  | anti-Env Serum IgG (ng/ml) |       |       |       |       |       |                             | anti-FLSC Serum IgG (ng/ml) |       |       |        |       |       |       |
|                                                                                          | 811                        | 814   | 815   | 819   | 821   | 822   | Avg                         | 811                         | 814   | 815   | 819    | 821   | 822   | Avg   |
| Week 0                                                                                   | 0                          | 0     | 492   | 0     | 0     | 48    | 90                          | 0                           | 0     | 220   | 0      | 0     | 56    | 46    |
| Week 7                                                                                   | 17969                      | 20702 | 12189 | 64860 | 44156 | 24320 | 30699                       | 20117                       | 30625 | 16897 | 105413 | 77882 | 39631 | 48427 |
| Week 12                                                                                  | 16474                      | 8172  | 4859  | 21017 | 11735 | 7989  | 11708                       | 13481                       | 20142 | 4976  | 40356  | 20397 | 14468 | 18970 |
| Week 17                                                                                  | 7592                       | 4866  | 1970  | 11404 | 5601  | 4725  | 6026                        | 7710                        | 5058  | 1714  | 12020  | 7725  | 7918  | 7024  |
|                                                                                          |                            |       |       |       |       |       |                             |                             |       |       |        |       |       |       |
| Env IM<br>Group:                                                                         | anti-Env Serum IgG (ng/ml) |       |       |       |       |       | anti-FLSC Serum IgG (ng/ml) |                             |       |       |        |       |       |       |
|                                                                                          | 802                        | 809   | 816   | 817   | 820   | Avg   | 802                         | 809                         | 816   | 817   | 820    | Avg   |       |       |
| Week 0                                                                                   | 80                         | 0     | 0     | 0     | 0     | 16    | 66                          | 0                           | 0     | 0     | 0      | 13    |       |       |
| Week 7                                                                                   | 21658                      | 11146 | 10878 | 3756  | 7162  | 10920 | 9528                        | 5651                        | 6106  | 2038  | 5424   | 5749  |       |       |
| Week 12                                                                                  | 2202                       | 1849  | 1578  | 648   | 1499  | 1555  | 1224                        | 1159                        | 1036  | 508   | 1188   | 1023  |       |       |
| Week 17                                                                                  | 1068                       | 940   | 358   | 419   | 562   | 669   | 720                         | 532                         | 278   | 320   | 344    | 439   |       |       |

\*Values in this table were determined by ELISA and correspond to Figure 4.
